# Supplementary material
Source: Springer Nature journal article supplement (https://www.springermedizin.de/resource/supplementary/12943_2010_814_MOESM11_ESM.pdf/9554896)

**A****MCF-7**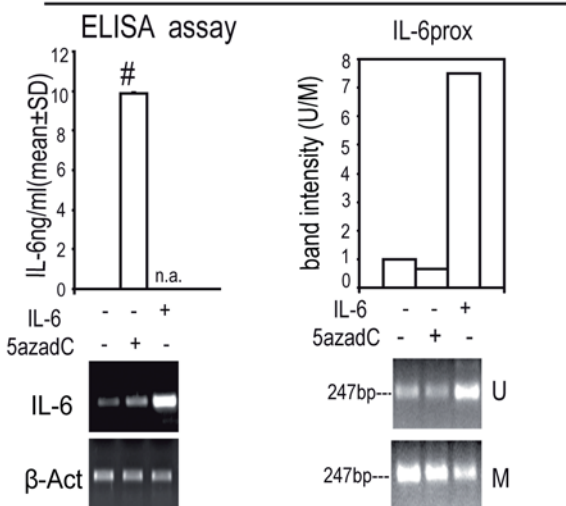**C**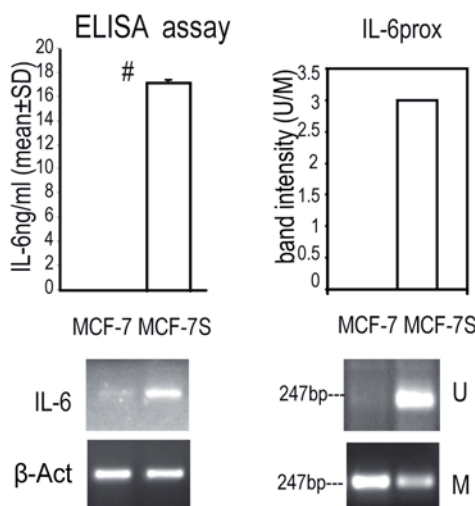**B****MDA-MB231**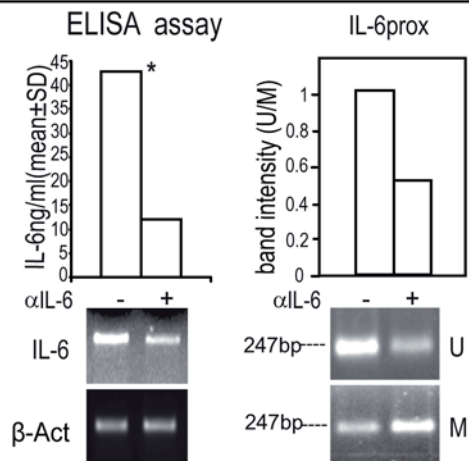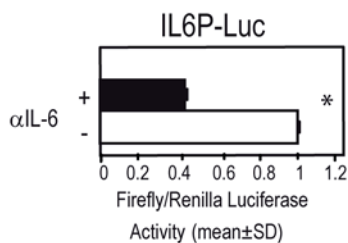**p53D**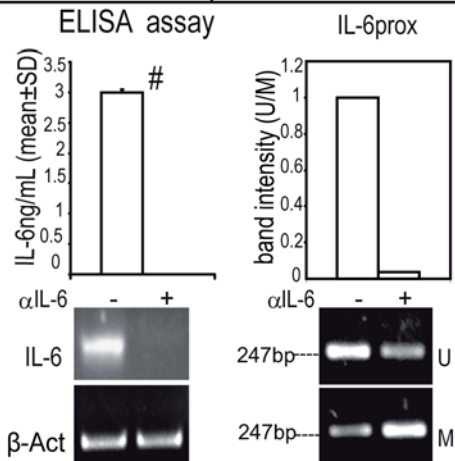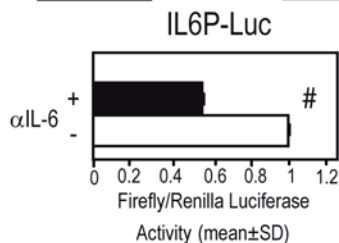

Supplement: MOESM11 [file 9554896]
